# Supplementary material for: From Solid-State Cluster Compounds to Functional PMMA-Based Composites with UV and NIR Blocking Properties, and Tuned Hues
Source: MDPI journal article supplement (doi:10.3390/nano13010144), 2022-12-28
Supplement: s1 [file s1]

## Electronic Supplementary Information

|                                                                                                                                                                                                                                                                                                                                                                                                                 |   |
|-----------------------------------------------------------------------------------------------------------------------------------------------------------------------------------------------------------------------------------------------------------------------------------------------------------------------------------------------------------------------------------------------------------------|---|
| <b>Figure S1.</b> $^1\text{H}$ -NMR ( $\text{CDCl}_3$ ) of $\text{Ta}_x\text{@PMMA}$ copolymer pellets in the oxidised form.....                                                                                                                                                                                                                                                                                | 2 |
| <b>Figure S2.</b> $^1\text{H}$ -NMR spectra ( $\text{CD}_2\text{Cl}_2$ ) of DMAP (top) and $(\text{TBA})_2[\{\text{Ta}_6\text{Br}_{12}^{\text{i}}\}\text{Br}_6^{\text{a}}]$ with two equivalents of DMAP (bottom).....                                                                                                                                                                                          | 2 |
| <b>Figure S3.</b> Mid-FTIR spectra of DMAP (straight) and $(\text{TBA})_2[\{\text{Ta}_6\text{Br}_{12}^{\text{i}}\}\text{Br}_6^{\text{a}}]$ with two equivalents of DMAP (dash).....                                                                                                                                                                                                                             | 3 |
| <b>Figure S4.</b> DSC thermograms of $\text{Ta}_1\text{@PMMA}$ . (straight) oxidized state heating cycle and (dot) cooling cycle and (dash) reduced state heating cycle and (dash dot) cooling cycle.....                                                                                                                                                                                                       | 3 |
| <b>Figure S5.</b> DSC thermograms of $\text{Ta}_2\text{@PMMA}$ . (straight) oxidized state heating cycle and (dot) cooling cycle and (dash) reduced state heating cycle and (dash dot) cooling cycle.....                                                                                                                                                                                                       | 4 |
| <b>Figure S6.</b> DSC thermograms of $\text{Ta}_3\text{@PMMA}$ . (straight) oxidized state heating cycle and (dot) cooling cycle and (dash) reduced state heating cycle and (dash dot) cooling cycle.....                                                                                                                                                                                                       | 4 |
| <b>Figure S7.</b> Mid-FTIR a) $\text{Ta}_1\text{@PMMA}_{\text{brown}}$ (bottom), $\text{Ta}_1\text{@PMMA}_{\text{green}}$ (top), b) $\text{Ta}_2\text{@PMMA}_{\text{brown}}$ (bottom), $\text{Ta}_2\text{@PMMA}_{\text{green}}$ (top), c) $\text{Ta}_3\text{@PMMA}_{\text{brown}}$ (bottom), $\text{Ta}_3\text{@PMMA}_{\text{green}}$ (top).....                                                                | 5 |
| <b>Figure S8.</b> Far IR spectra of a) PMMA, b) $\text{TBA}_2\text{Ta}_6\text{Br}_{18}$ , c) $\text{Ta}_1\text{@PMMA}_{\text{brown}}$ (bottom), $\text{Ta}_2\text{@PMMA}_{\text{brown}}$ (medium), $\text{Ta}_3\text{@PMMA}_{\text{brown}}$ (top), d) $\text{Ta}_1\text{@PMMA}_{\text{green}}$ (bottom), $\text{Ta}_2\text{@PMMA}_{\text{green}}$ (medium), $\text{Ta}_3\text{@PMMA}_{\text{green}}$ (top)..... | 6 |
| <b>Table S1.</b> Main far IR absorption bands for $[\{\text{Ta}_6\text{Br}_{12}^{\text{i}}\}\text{Br}_6^{\text{a}}]^{2-}$ , PMMA and $\text{Ta}_x\text{@PMMA}$ composites.....                                                                                                                                                                                                                                  | 7 |
| <b>Figure S9.</b> CIE chromaticity coordinates of $\text{Ta}_x\text{@PMMA}$ ( $\text{VEC} = 14$ in the oxidized form and $\text{VEC} = 16$ in the reduced form).....                                                                                                                                                                                                                                            | 7 |
| <b>Table S2.</b> $x$ , $y$ , $z$ and $L^*$ , $a^*$ , $b$ colour coordinates of $\text{Ta}_x\text{@PMMA}$ composites.....                                                                                                                                                                                                                                                                                        | 7 |

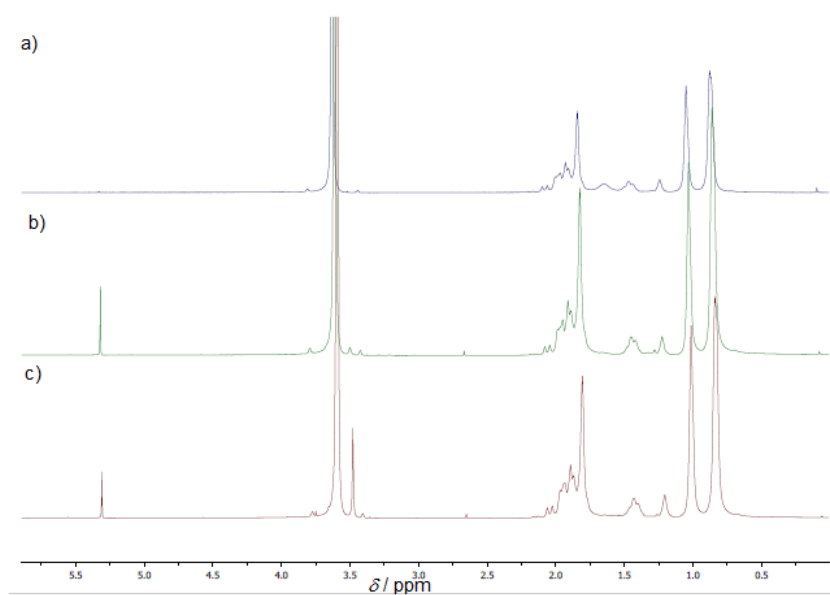

Figure S1.  $^1\text{H}$ -NMR ( $\text{CDCl}_3$ ) of  $\text{Ta}_x\text{@PMMA}_{\text{brown}}$  copolymer pellets in the oxidised form: a) 1 wt%, b) 2 wt% and c) 3 wt%

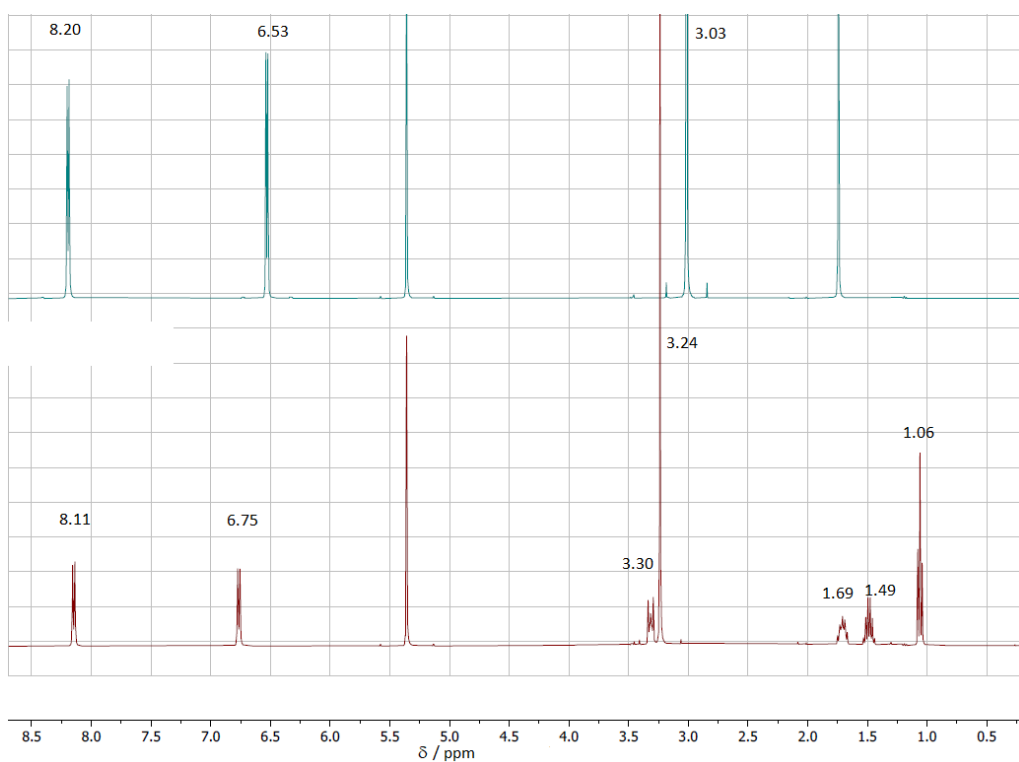

Figure S2.  $^1\text{H}$ -NMR spectra ( $\text{CD}_2\text{Cl}_2$ ) of DMAP (top) and  $(\text{TBA})_2[\{\text{Ta}_6\text{Br}_{12}\}\text{Br}_6]$  with two equivalents of DMAP (bottom).

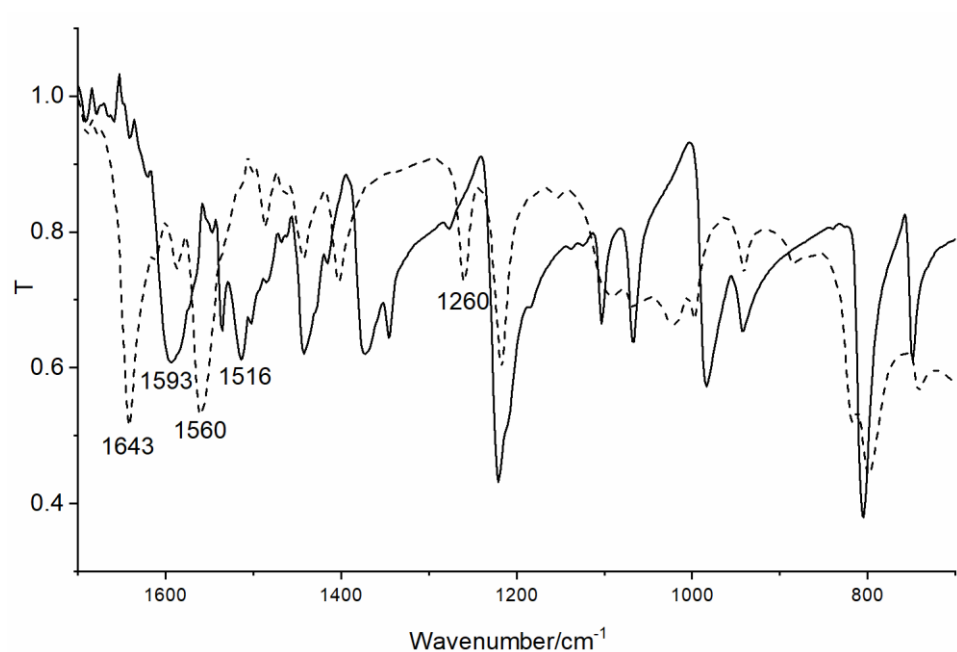

Figure S3. Mid-FTIR spectra of DMAP (solid) and (TBA)<sub>2</sub>[(Ta<sub>6</sub>Br<sub>12</sub>)Br<sub>6</sub>] with two equivalents of DMAP (dash).

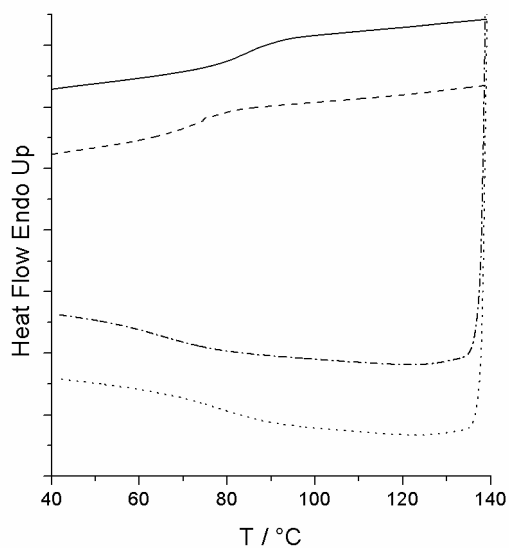

Figure S4. DSC thermograms of Ta-10-P10V10A. (solid) oxidized state heating cycle and (dot) cooling cycle and (dash) reduced state heating cycle and (dash dot) cooling cycle.

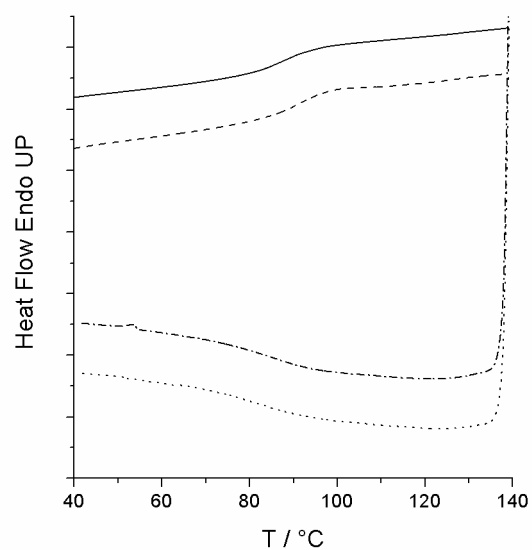

Figure S5. DSC thermograms of Ta\_2@PMMA. (solid) oxidized state heating cycle and (dot) cooling cycle and (dash) reduced state heating cycle and (dash dot) cooling cycle.

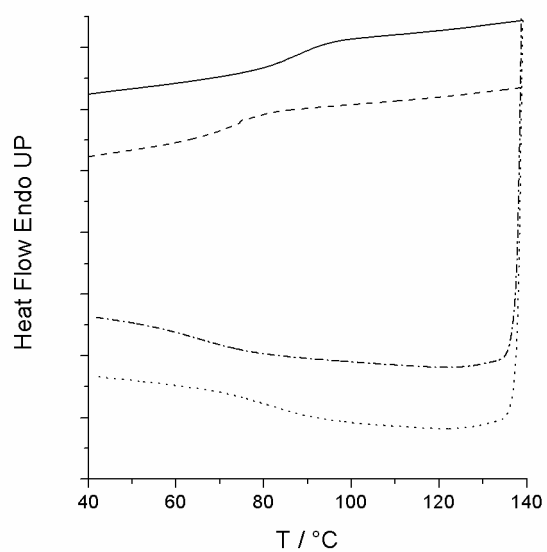

Figure S6. DSC thermograms of Ta\_3@PMMA. (solid) oxidized state heating cycle and (dot) cooling cycle and (dash) reduced state heating cycle and (dash dot) cooling cycle.

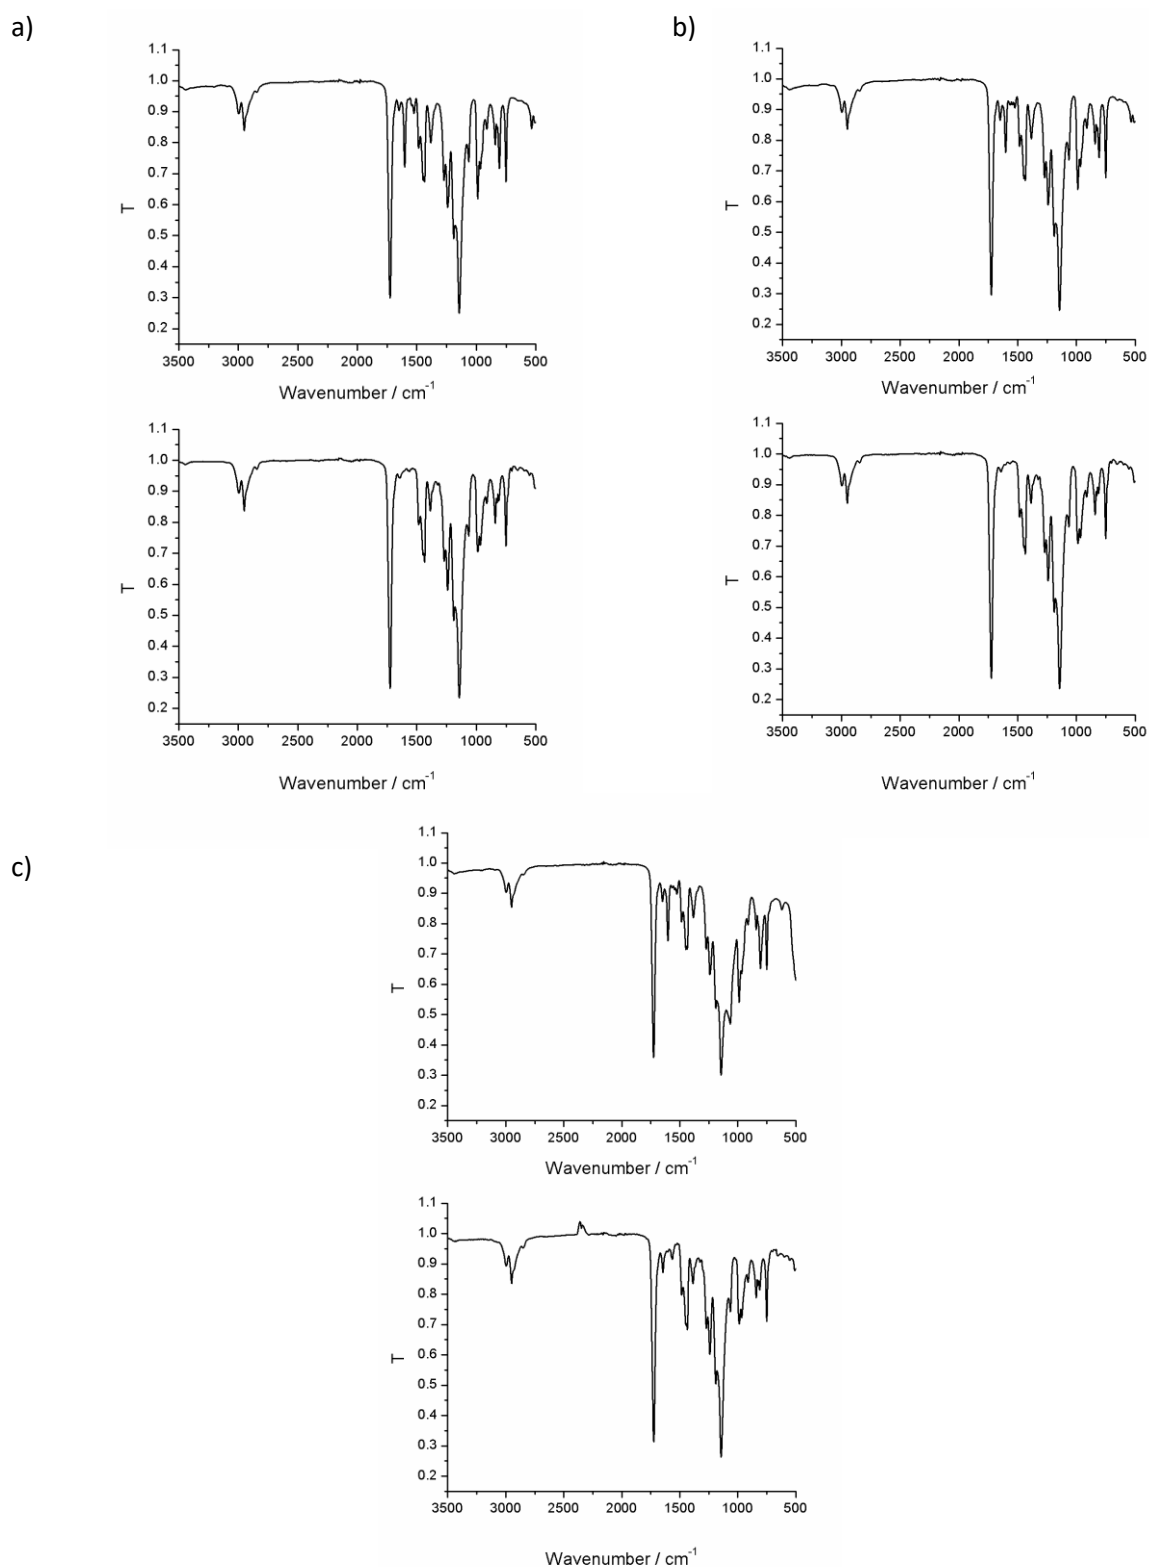

Figure S7. Mid-FTIR a) Ta<sub>1</sub>@PMMA<sub>brown</sub> (bottom), Ta<sub>1</sub>@PMMA<sub>green</sub> (top), b) Ta<sub>2</sub>@PMMA<sub>brown</sub> (bottom), Ta<sub>2</sub>@PMMA<sub>green</sub> (top), c) Ta<sub>3</sub>@PMMA<sub>brown</sub> (bottom), Ta<sub>3</sub>@PMMA<sub>green</sub> (top).

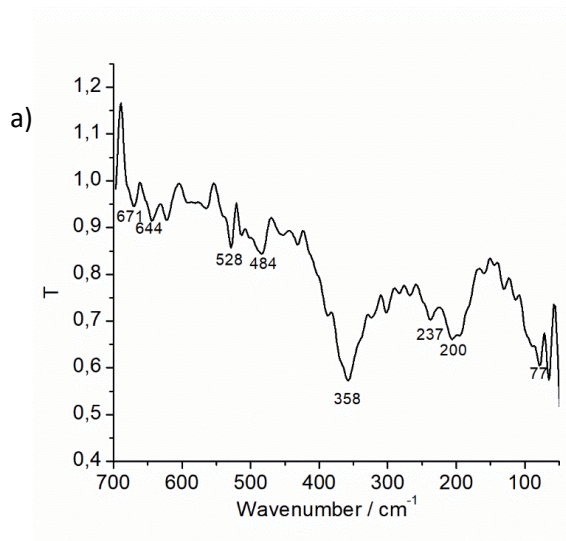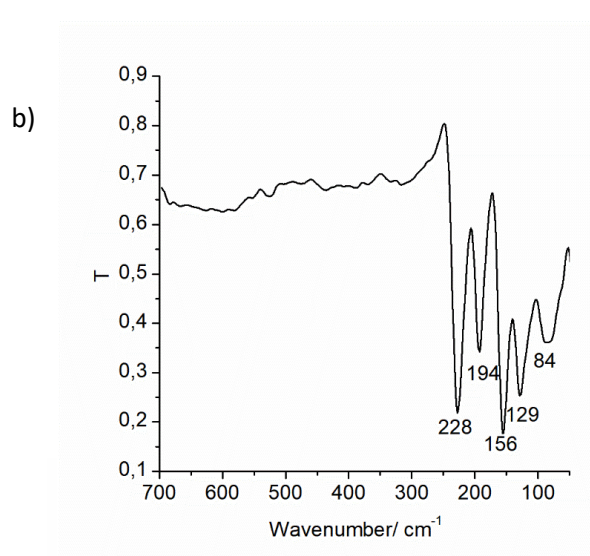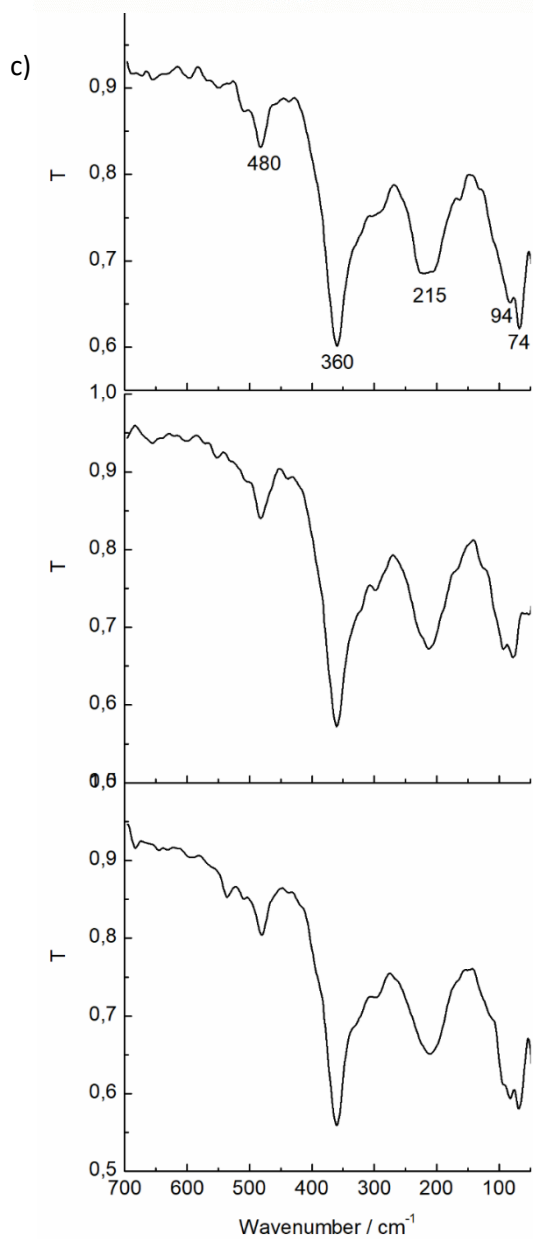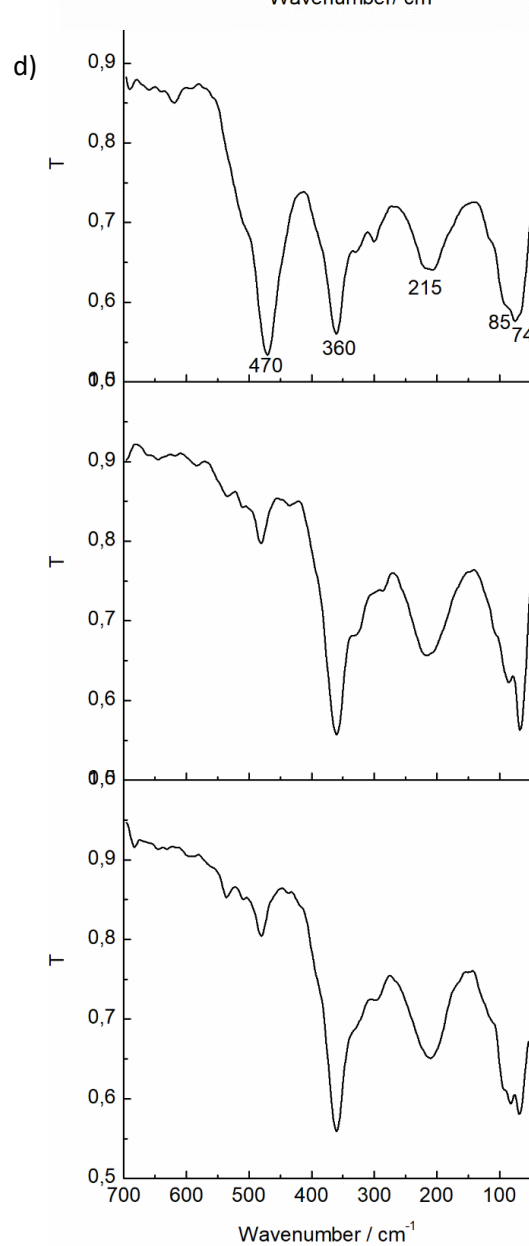

Figure S8. Far IR spectra of a) PMMA, b)  $\text{TBA}_2\text{Ta}_6\text{Br}_{18}$ , c)  $\text{Ta}_1\text{@PMMA}_{\text{brown}}$  (bottom),  $\text{Ta}_2\text{@PMMA}_{\text{brown}}$  (medium),  $\text{Ta}_3\text{@PMMA}_{\text{brown}}$  (top), d)  $\text{Ta}_1\text{@PMMA}_{\text{green}}$  (bottom),  $\text{Ta}_2\text{@PMMA}_{\text{green}}$  (medium),  $\text{Ta}_3\text{@PMMA}_{\text{green}}$  (top).

Table S1. Main far IR absorption bands for  $[\{\text{Ta}_6\text{Br}_{12}\}\text{Br}_6]^{2-}$ , PMMA and  $\text{Ta}_2\text{@PMMA}$  composites

| Reported for<br>$(\text{TEA})_2[\{\text{Ta}_6\text{Br}_{12}\}\text{Br}_6]^{1-}$ | Found for<br>$(\text{TBA})_2[\{\text{Ta}_6\text{Br}_{12}\}\text{Br}_6]$ | Reported<br>for PMMA | Found for<br>PMMA   | Ta-<br>2@PMMAox      | Ta-2@PMMA-<br>red     |
|---------------------------------------------------------------------------------|-------------------------------------------------------------------------|----------------------|---------------------|----------------------|-----------------------|
| -----                                                                           | -----                                                                   | 483 w                | 484 w               | 482 w                | 480 w                 |
| -----                                                                           | -----                                                                   | 365 br,vs            | 360 br, vs          | 360 br, vs           | 360 br, vs            |
| 230 vs                                                                          | 228 vs                                                                  | 228 vbr              | 237 w               | 227-200<br>vbr, m    | 221-200, vbr,<br>m    |
| 196 vs                                                                          | 194 vs                                                                  | ----                 | 200 vbr, m          |                      |                       |
| 161 vs                                                                          | 156 vs                                                                  | ----                 | ----                | ----                 | ----                  |
| 134 s                                                                           | 129 s                                                                   | ----                 | ----                | ----                 | ----                  |
| 98 m                                                                            | ---                                                                     | ----                 | ----                |                      |                       |
| 82 m                                                                            | 84 br, m                                                                | ----                 | 94 -75 br,<br>m, sp | 90 – 75 br,<br>m, sp | 95 – 75, br, m,<br>sp |

vs: very strong; s: strong; m: medium; w: weak; br: broad; vbr: very broad; sp: splitted

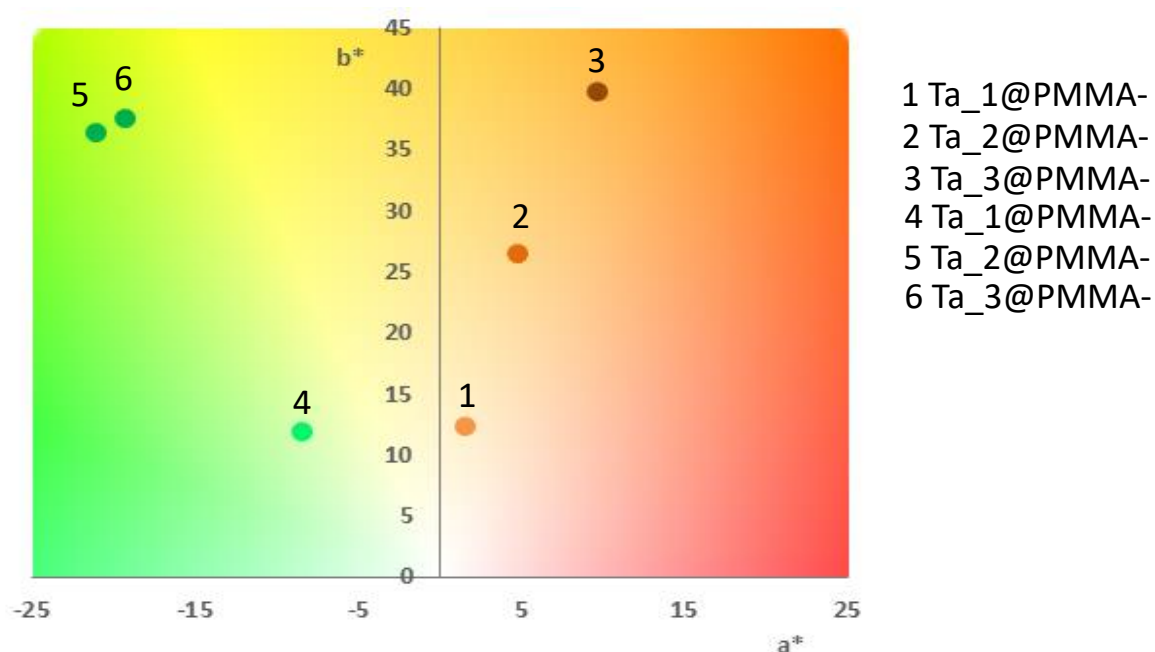

Figure S9. CIE chromaticity coordinates of  $\text{Ta}_x\text{@PMMA}$  (VEC = 14 in the oxidized form and VEC = 16 in the reduced form)

Table S2.  $L^*$ ,  $a^*$ ,  $b^*$  color coordinates of  $\text{Ta}_x\text{@PMMA}$  composites

| sample                     | $L^*$ | $a^*$  | $b^*$ | Color |
|----------------------------|-------|--------|-------|-------|
| Ta-1@PMMA <sub>brown</sub> | 92.2  | 1.49   | 12.38 |       |
| Ta-2@PMMA <sub>brown</sub> | 84.64 | 4.71   | 26.45 |       |
| Ta-3@PMMA <sub>brown</sub> | 79.18 | 9.52   | 39.91 |       |
| Ta-1@PMMA <sub>green</sub> | 92.14 | -8.53  | 11.87 |       |
| Ta-2@PMMA <sub>green</sub> | 76.47 | -21.12 | 36.36 |       |
| Ta-3@PMMA <sub>green</sub> | 71.75 | -19.33 | 37.53 |       |
